# Supplementary material for: Thermodynamically feasible photoelectron transfer from bioactive π-expanded imidazole luminophores to ZnO nanocrystals
Source: Royal Society of Chemistry journal article supplement (doi:10.1039/c4nj02003k), 2015-01-01
Supplement: c4nj02003k1.pdf [file c4nj02003k1.pdf]

## **Thermodynamic feasible photoelectron transfer from bioactive $\pi$ -expanded imidazole luminophore to ZnO nanocrystals**

**Jayaraman Jayabharathi\***, Chockalingam Karunakaran, Vellaikannu Kalaiarasi

*Department of Chemistry, Annamalai University, Annamalainagar 608 002, Tamilnadu, India.*

\* Address for correspondence

Dr. J. Jayabharathi  
Professor of Chemistry  
Department of Chemistry  
Annamalai University  
Annamalainagar 608 002  
Tamilnadu, India.  
Tel: +91 9443940735  
E-mail: jtchalam2005@yahoo.co.in

---

\* Corresponding author. Tel.: +91 9443940735  
E-mail address: jtchalam2005@yahoo.co.in

**Table S1.** Mulliken atomic charges of imidazole, imidazole–Zn<sub>n</sub>O<sub>n</sub> clusters (n = 1-5)

| S. No. | Imidazole |                | Imidazole-ZnO |                | Imidazole-Zn <sub>2</sub> O <sub>2</sub> |                | Imidazole-Zn <sub>3</sub> O <sub>3</sub> |                | Imidazole-Zn <sub>4</sub> O <sub>4</sub> |                | Imidazole-Zn <sub>5</sub> O <sub>5</sub> |                |
|--------|-----------|----------------|---------------|----------------|------------------------------------------|----------------|------------------------------------------|----------------|------------------------------------------|----------------|------------------------------------------|----------------|
|        | Atoms     | Atomic charges | Atoms         | Atomic charges | Atoms                                    | Atomic charges | Atoms                                    | Atomic charges | Atoms                                    | Atomic charges | Atoms                                    | Atomic charges |
| 1      | C         | 0.015369       | C             | 0.219342       | C                                        | 0.218375       | C                                        | 0.015615       | C                                        | 0.041513       | C                                        | 0.281339       |
| 2      | C         | 0.160691       | C             | 0.194925       | C                                        | 0.164047       | C                                        | 0.210518       | C                                        | 0.223136       | C                                        | 0.249987       |
| 3      | C         | 0.148338       | C             | 0.352964       | C                                        | 0.342110       | C                                        | 0.298912       | C                                        | 0.194303       | C                                        | 0.114692       |
| 4      | C         | 0.148338       | C             | 0.263731       | C                                        | 0.173020       | C                                        | 0.042713       | C                                        | 0.119776       | C                                        | 0.040415       |
| 5      | C         | 0.243078       | C             | -0.227947      | C                                        | -0.193496      | C                                        | -0.105924      | C                                        | -0.101662      | C                                        | -0.090457      |
| 6      | C         | -0.370375      | C             | -0.331741      | C                                        | -0.230110      | C                                        | -0.115383      | C                                        | -0.114916      | C                                        | -0.557520      |
| 7      | C         | -0.151396      | C             | -0.156119      | C                                        | -0.186989      | C                                        | -0.239475      | C                                        | -0.251408      | C                                        | -0.156720      |
| 8      | H         | 0.181195       | H             | 0.203519       | H                                        | 0.168389       | H                                        | 0.249381       | H                                        | 0.266894       | H                                        | 0.204256       |
| 9      | C         | -0.283833      | C             | -0.281675      | C                                        | -0.326713      | C                                        | -0.260508      | C                                        | -0.404901      | C                                        | -0.122240      |
| 10     | H         | 0.242337       | H             | 0.343732       | H                                        | 0.297410       | H                                        | 0.238118       | H                                        | 0.205496       | H                                        | 0.544739       |
| 11     | C         | -0.309906      | C             | -0.305388      | C                                        | -0.314652      | C                                        | -0.336590      | C                                        | -0.293556      | C                                        | -0.348353      |
| 12     | H         | 0.187431       | H             | 0.190186       | H                                        | 0.184032       | H                                        | 0.202279       | H                                        | 0.202521       | H                                        | 0.223179       |
| 13     | H         | 0.207261       | H             | 0.222317       | H                                        | 0.219417       | H                                        | 0.214179       | H                                        | 0.230151       | H                                        | 0.213374       |
| 14     | H         | 0.226049       | H             | 0.230071       | H                                        | 0.220959       | H                                        | 0.221650       | H                                        | 0.223184       | H                                        | 0.238906       |
| 15     | C         | 0.350506       | C             | 0.335721       | C                                        | 0.360376       | C                                        | 0.307055       | C                                        | 0.255215       | C                                        | 0.277795       |
| 16     | C         | -0.334154      | C             | -0.329816      | C                                        | -0.347918      | C                                        | -0.329784      | C                                        | -0.319504      | C                                        | -0.301100      |
| 17     | C         | -0.350853      | C             | -0.279005      | C                                        | -0.328620      | C                                        | -0.207801      | C                                        | -0.116250      | C                                        | -0.074045      |
| 18     | C         | -0.322119      | C             | -0.326517      | C                                        | -0.328519      | C                                        | -0.327880      | C                                        | -0.321886      | C                                        | -0.329283      |
| 19     | H         | 0.245120       | H             | 0.236599       | H                                        | 0.232256       | H                                        | 0.234999       | H                                        | 0.232420       | H                                        | 0.265331       |
| 20     | C         | -0.140124      | C             | -0.134994      | C                                        | -0.140305      | C                                        | -0.187925      | C                                        | -0.209799      | C                                        | -0.223754      |
| 21     | H         | 0.323001       | H             | 0.208857       | H                                        | 0.272420       | H                                        | 0.296889       | H                                        | 0.211664       | H                                        | 0.144210       |
| 22     | C         | -0.290052      | C             | -0.283172      | C                                        | -0.288212      | C                                        | -0.266152      | C                                        | -0.254047      | C                                        | 0.144210       |

---

|    |   |           |   |           |   |           |   |           |   |           |   |           |
|----|---|-----------|---|-----------|---|-----------|---|-----------|---|-----------|---|-----------|
| 23 | H | 0.200868  | H | 0.204493  | H | 0.199395  | H | 0.204134  | H | 0.201466  | H | 0.213161  |
| 24 | H | 0.176283  | H | 0.188149  | H | 0.193908  | H | 0.194137  | H | 0.191955  | H | 0.177880  |
| 25 | H | 0.226571  | H | 0.229038  | H | 0.224531  | H | 0.220258  | H | 0.218924  | H | 0.214539  |
| 26 | N | -0.196058 | N | -0.568141 | N | -0.630555 | N | -0.483122 | N | -0.555991 | N | -0.673708 |
| 27 | N | -0.537013 | N | -0.567442 | N | -0.548226 | N | -0.609831 | N | -0.531509 | N | -0.715327 |
| 28 | C | 0.188581  | C | 0.155866  | C | 0.174656  | C | 0.147271  | C | 0.158939  | C | 0.162459  |
| 29 | C | -0.167173 | C | -0.159131 | C | -0.165720 | C | -0.149889 | C | -0.160119 | C | -0.242490 |
| 30 | C | 0.277229  | C | 0.381344  | C | 0.393959  | C | 0.373277  | C | 0.374607  | C | 0.326384  |
| 31 | C | -0.300566 | C | -0.302614 | C | -0.309320 | C | -0.298512 | C | -0.291289 | C | -0.255984 |
| 32 | H | 0.220821  | H | 0.226606  | H | 0.218489  | H | 0.227898  | H | 0.232136  | H | 0.242185  |
| 33 | C | -0.387900 | C | -0.385414 | C | -0.391365 | C | -0.391259 | C | -0.380947 | C | -0.346036 |
| 34 | C | -0.183615 | C | -0.169694 | C | -0.172009 | C | -0.172326 | C | -0.166965 | C | -0.232278 |
| 35 | H | 0.216708  | H | 0.227149  | H | 0.222891  | H | 0.225809  | H | 0.230569  | H | 0.213576  |
| 36 | H | 0.214973  | H | 0.227026  | H | 0.220498  | H | 0.222199  | H | 0.226219  | H | 0.208535  |
| 37 | C | 0.214854  | C | 0.216053  | C | 0.220728  | C | 0.249414  | C | 0.238819  | C | 0.199152  |
| 38 | C | 0.086853  | C | 0.087190  | C | 0.090147  | C | 0.083528  | C | 0.062283  | C | 0.027583  |
| 39 | C | -0.214560 | C | -0.216448 | C | -0.205571 | C | -0.226170 | C | -0.232466 | C | -0.239252 |
| 40 | C | -0.333835 | C | -0.338571 | C | -0.335887 | C | -0.339937 | C | -0.330042 | C | -0.314905 |
| 41 | C | 0.370329  | C | 0.368964  | C | 0.370457  | C | 0.372321  | C | 0.374587  | C | 0.373623  |
| 42 | C | -0.253789 | C | -0.262895 | C | -0.262778 | C | -0.262519 | C | -0.257310 | C | -0.249849 |
| 43 | H | 0.251792  | H | 0.243884  | H | 0.244552  | H | 0.245449  | H | 0.247889  | H | 0.282246  |
| 44 | C | -0.232219 | C | -0.227567 | C | -0.229141 | C | -0.229946 | C | -0.231555 | C | -0.252243 |
| 45 | H | 0.273189  | H | 0.269136  | H | 0.266769  | H | 0.270593  | H | 0.278624  | H | 0.294484  |
| 46 | C | -0.391162 | C | -0.387261 | C | -0.388746 | C | -0.391744 | C | -0.392481 | C | -0.406303 |
| 47 | C | -0.419919 | C | -0.414560 | C | -0.416887 | C | -0.425671 | C | -0.429189 | C | -0.463895 |
| 48 | H | 0.218326  | H | 0.225422  | H | 0.222377  | H | 0.220577  | H | 0.220767  | H | 0.201849  |
| 49 | C | -0.233435 | C | -0.231896 | C | -0.232853 | C | -0.232883 | C | -0.232270 | C | -0.234692 |

---

|    |   |           |    |           |    |           |    |           |    |           |    |           |
|----|---|-----------|----|-----------|----|-----------|----|-----------|----|-----------|----|-----------|
| 50 | H | 0.219075  | H  | 0.224559  | H  | 0.222612  | H  | 0.222757  | H  | 0.222955  | H  | 0.209677  |
| 51 | H | 0.221449  | H  | 0.225976  | H  | 0.224098  | H  | 0.223587  | H  | 0.222981  | H  | 0.213104  |
| 52 | H | 0.226987  | H  | 0.233385  | H  | 0.230895  | H  | 0.229496  | H  | 0.229169  | H  | 0.215293  |
| 53 | H | 0.218198  | H  | 0.223985  | H  | 0.221721  | H  | 0.220697  | H  | 0.220331  | H  | 0.206394  |
| 54 | H | 0.213087  | H  | 0.231534  | H  | 0.224967  | H  | 0.215924  | H  | 0.220980  | H  | 0.200226  |
| 55 | O | -0.595132 | O  | -0.697950 | O  | -0.683816 | O  | -0.670068 | O  | -0.677471 | O  | -0.736095 |
| 56 | H | 0.396445  | H  | 0.469632  | H  | 0.477084  | H  | 0.415270  | H  | 0.417559  | H  | 0.415394  |
| 57 |   |           | Zn | 0.837731  | Zn | 1.183748  | Zn | 1.222681  | Zn | 1.242076  | Zn | 1.342287  |
| 58 |   |           | O  | -1.113128 | Zn | 0.925407  | Zn | 0.921911  | O  | -1.053102 | Zn | 1.127580  |
| 59 |   |           |    |           | O  | -1.050740 | Zn | 0.980595  | O  | -1.090686 | Zn | 0.833465  |
| 60 |   |           |    |           | O  | -1.117551 | O  | -1.061861 | O  | -0.971709 | O  | -0.884671 |
| 61 |   |           |    |           |    |           | O  | -0.988969 | O  | -1.066436 | O  | -1.036128 |
| 62 |   |           |    |           |    |           | O  | -1.129960 | Zn | 0.927935  | O  | -0.969446 |
| 63 |   |           |    |           |    |           |    |           | Zn | 1.092103  | Zn | 1.002395  |
| 64 |   |           |    |           |    |           |    |           | Zn | 0.979322  | O  | -1.087133 |
| 65 |   |           |    |           |    |           |    |           |    |           | Zn | 1.068486  |
| 66 |   |           |    |           |    |           |    |           |    |           | O  | -0.977631 |

**Table S2.** Mulliken atomic charges of imidazole–Zn<sub>n</sub>O<sub>n</sub> clusters (n = 6-9)

| S. No. | Imidazole-Zn <sub>6</sub> O <sub>6</sub> |                | Imidazole-Zn <sub>7</sub> O <sub>7</sub> |                | Imidazole-Zn <sub>8</sub> O <sub>8</sub> |                | Imidazole-Zn <sub>9</sub> O <sub>9</sub> |                |
|--------|------------------------------------------|----------------|------------------------------------------|----------------|------------------------------------------|----------------|------------------------------------------|----------------|
|        | Atoms                                    | Atomic charges |
| 1      | C                                        | 0.081996       | C                                        | 0.030282       | C                                        | 0.030282       | C                                        | 0.246294       |
| 2      | C                                        | 0.127220       | C                                        | 0.030282       | C                                        | 0.159546       | C                                        | 0.138339       |
| 3      | C                                        | 0.389323       | C                                        | 0.411610       | C                                        | 0.411610       | C                                        | 0.526128       |
| 4      | C                                        | 0.380612       | C                                        | 0.342494       | C                                        | 0.342494       | C                                        | 0.349627       |
| 5      | C                                        | -0.374945      | C                                        | -0.188895      | C                                        | -0.188895      | C                                        | -0.184606      |
| 6      | C                                        | -0.281298      | C                                        | -0.279035      | C                                        | -0.279035      | C                                        | -0.379258      |
| 7      | C                                        | -0.162007      | C                                        | -0.233997      | C                                        | -0.233997      | C                                        | -0.183644      |
| 8      | H                                        | 0.186415       | H                                        | 0.110917       | H                                        | 0.110917       | H                                        | 0.061182       |
| 9      | C                                        | 0.041152       | C                                        | -0.169194      | C                                        | -0.169194      | C                                        | -0.258516      |
| 10     | H                                        | 0.062879       | H                                        | 0.117255       | H                                        | 0.117255       | H                                        | 0.209977       |
| 11     | C                                        | -0.347672      | C                                        | -0.299123      | C                                        | -0.299123      | C                                        | -0.256841      |
| 12     | H                                        | 0.203029       | H                                        | 0.213948       | H                                        | 0.213948       | H                                        | 0.204469       |
| 13     | H                                        | 0.205310       | H                                        | 0.217749       | H                                        | 0.217749       | H                                        | 0.214406       |
| 14     | H                                        | 0.239598       | H                                        | 0.247196       | H                                        | 0.247196       | H                                        | 0.249173       |
| 15     | C                                        | 0.365285       | C                                        | 0.210541       | C                                        | 0.210541       | C                                        | 0.373193       |
| 16     | C                                        | -0.336136      | C                                        | -0.318020      | C                                        | -0.318020      | C                                        | -0.339953      |
| 17     | C                                        | -0.309994      | C                                        | -0.188449      | C                                        | -0.188449      | C                                        | -0.301399      |
| 18     | C                                        | -0.303072      | C                                        | -0.234457      | C                                        | -0.234457      | C                                        | -0.318317      |
| 19     | H                                        | 0.229096       | H                                        | 0.229902       | H                                        | 0.229902       | H                                        | 0.239257       |
| 20     | C                                        | -0.151374      | C                                        | -0.180776      | C                                        | -0.180776      | C                                        | -0.152313      |
| 21     | H                                        | 0.314287       | H                                        | 0.236882       | H                                        | 0.236882       | H                                        | 0.291239       |
| 22     | C                                        | -0.252866      | C                                        | -0.253144      | C                                        | -0.253144      | C                                        | -0.269793      |

---

|    |   |           |   |           |   |           |   |           |
|----|---|-----------|---|-----------|---|-----------|---|-----------|
| 23 | H | 0.196485  | H | 0.219011  | H | 0.219011  | H | 0.202874  |
| 24 | H | 0.190277  | H | 0.209504  | H | 0.209504  | H | 0.186953  |
| 25 | H | 0.219706  | H | 0.233508  | H | 0.233508  | H | 0.226935  |
| 26 | N | -0.671809 | N | -0.497215 | N | -0.497215 | N | -0.804517 |
| 27 | N | -0.549308 | N | -0.603205 | N | -0.603205 | N | -0.603467 |
| 28 | C | 0.140475  | C | 0.028466  | C | 0.028466  | C | 0.191302  |
| 29 | C | -0.130066 | C | 0.001343  | C | 0.001343  | C | -0.128572 |
| 30 | C | 0.430183  | C | 0.375921  | C | 0.375921  | C | 0.349579  |
| 31 | C | -0.306147 | C | -0.309529 | C | -0.309529 | C | -0.308053 |
| 32 | H | 0.228846  | H | 0.180865  | H | 0.180865  | H | 0.215838  |
| 33 | C | -0.366567 | C | -0.391023 | C | -0.391023 | C | -0.386090 |
| 34 | C | -0.172113 | C | -0.127433 | C | -0.127433 | C | -0.161597 |
| 35 | H | 0.227379  | H | 0.230457  | H | 0.230457  | H | 0.224285  |
| 36 | H | 0.226399  | H | 0.222888  | H | 0.222888  | H | 0.221144  |
| 37 | C | 0.173563  | C | -0.069290 | C | -0.069290 | C | 0.226004  |
| 38 | C | 0.111559  | C | 0.184214  | C | 0.184214  | C | 0.085631  |
| 39 | C | -0.195023 | C | -0.153519 | C | -0.153519 | C | -0.223171 |
| 40 | C | -0.346394 | C | -0.351590 | C | -0.351590 | C | -0.326303 |
| 41 | C | 0.367598  | C | 0.304790  | C | 0.304790  | C | 0.381639  |
| 42 | C | -0.255344 | C | -0.249828 | C | -0.249828 | C | -0.263286 |
| 43 | H | 0.246866  | H | 0.232839  | H | 0.232839  | H | 0.243592  |
| 44 | C | -0.220065 | C | -0.215280 | C | -0.215280 | C | -0.228378 |
| 45 | H | 0.262628  | H | 0.246816  | H | 0.246816  | H | 0.271859  |
| 46 | C | -0.380085 | C | -0.334883 | C | -0.334883 | C | -0.388519 |
| 47 | C | -0.406290 | C | -0.349915 | C | -0.349915 | C | -0.421106 |
| 48 | H | 0.220754  | H | 0.214909  | H | 0.214909  | H | 0.220507  |
| 49 | C | -0.228162 | C | -0.225051 | C | -0.225051 | C | -0.228368 |

---

---

|    |           |    |           |    |           |    |           |
|----|-----------|----|-----------|----|-----------|----|-----------|
| 50 | 0.220189  | H  | 0.212880  | H  | 0.212880  | H  | 0.224677  |
| 51 | 0.223860  | H  | 0.217473  | H  | 0.217473  | H  | 0.222992  |
| 52 | 0.230576  | H  | 0.225619  | H  | 0.225619  | H  | 0.231264  |
| 53 | 0.221784  | H  | 0.220805  | H  | 0.220805  | H  | 0.221965  |
| 54 | 0.256733  | H  | 0.223205  | H  | 0.223205  | H  | 0.215740  |
| 55 | -0.833827 | O  | -0.607110 | O  | -0.607110 | O  | -0.631834 |
| 56 | 0.521618  | H  | 0.408540  | H  | 0.408540  | H  | 0.408571  |
| 57 | 0.977659  | Zn | 0.905208  | Zn | 0.905208  | Zn | 1.096638  |
| 58 | 1.063634  | Zn | 1.070956  | Zn | 1.070956  | Zn | 1.083851  |
| 59 | 1.081525  | Zn | 1.055045  | Zn | 1.055045  | Zn | 1.088251  |
| 60 | 1.051181  | Zn | 1.054664  | Zn | 1.054664  | Zn | 1.063189  |
| 61 | 1.142146  | Zn | 1.037489  | Zn | 1.037489  | Zn | 1.129516  |
| 62 | 1.297015  | Zn | 1.038231  | Zn | 1.038231  | Zn | 1.087209  |
| 63 | -1.118431 | Zn | 0.981266  | Zn | 0.981266  | Zn | 1.046960  |
| 64 | -1.099285 | Zn | 1.172236  | Zn | 1.172236  | Zn | 1.070058  |
| 65 | -1.079629 | O  | -0.974166 | O  | -0.974166 | Zn | 1.257823  |
| 66 | -1.124653 | O  | -1.070314 | O  | -1.070314 | O  | -1.219505 |
| 67 | -1.225663 | O  | -1.109742 | O  | -1.109742 | O  | -1.103437 |
| 68 | -1.128616 | O  | -1.066156 | O  | -1.066156 | O  | -1.112812 |
| 69 |           | O  | -1.046372 | O  | -1.046372 | O  | -1.058769 |
| 70 |           | O  | -1.074907 | O  | -1.074907 | O  | -1.108688 |
| 71 |           | O  | -1.057891 | O  | -1.057891 | O  | -1.133787 |
| 72 |           | O  | -1.007957 | O  | -1.007957 | O  | -1.069287 |
| 73 |           |    |           |    |           | O  | -1.057571 |
| 74 |           |    |           |    |           | O  | -1.188372 |

---
